# Supplementary material for: Metagenomic Analysis of Plasma Microbial Extracellular Vesicles in Patients Receiving Mechanical Ventilation: A Pilot Study
Source: MDPI journal article supplement (doi:10.3390/jpm12040564), 2022-04-02
Supplement: s1 [file s1]

**Supplementary Figure S1.** ROC curves showing the accuracy of MEV strain to discriminate between survivors and non-survivors at day 7 AUC 0.70 (95% CI 0.63-0.80,  $P=0.126$ )

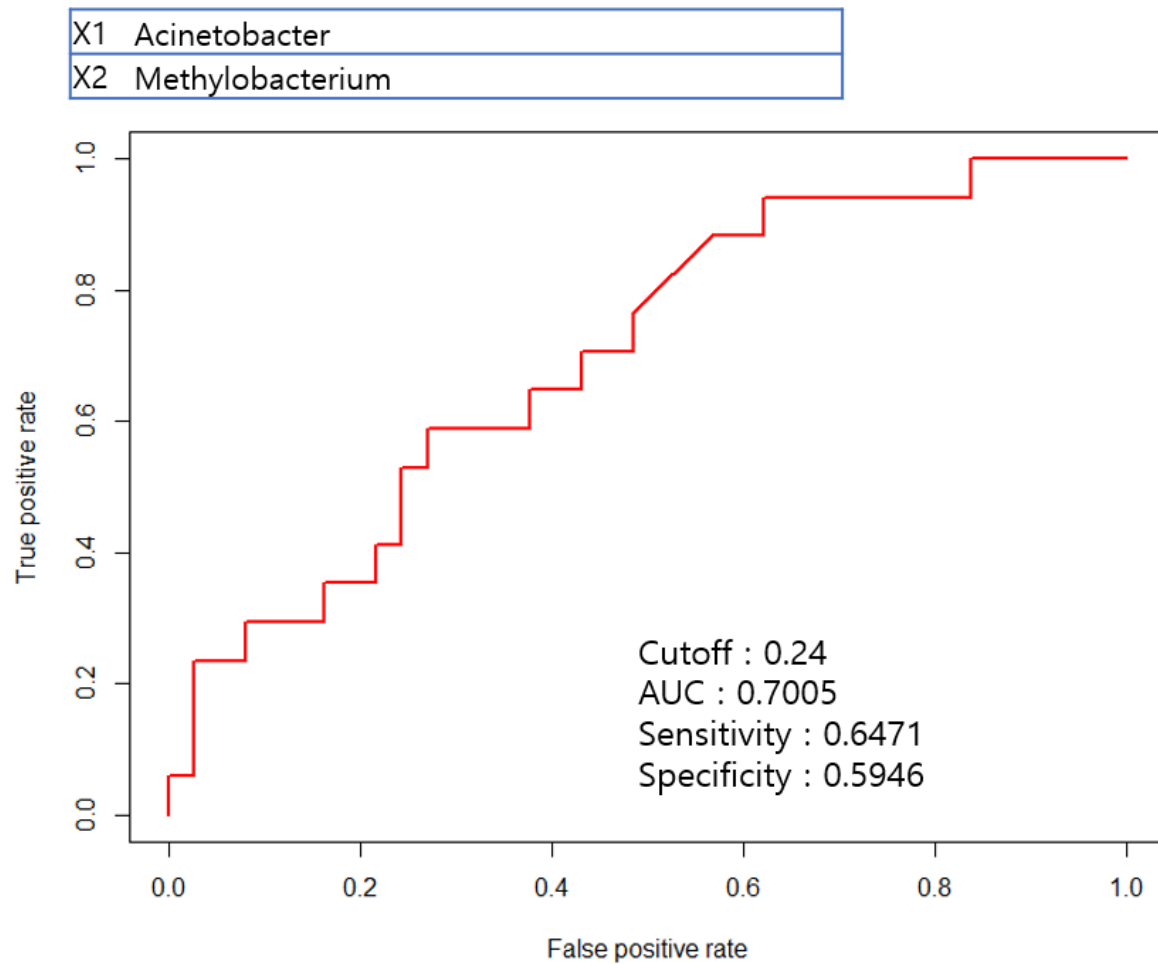

MEV: microbial extracellular vesicle; ROC: receiver operating characteristic; AUC: area under the receiver operating characteristic curve. CI confidence interval
