# Supplementary material for: Metagenomic Analysis of Plasma Microbial Extracellular Vesicles in Patients Receiving Mechanical Ventilation: A Pilot Study
Source: MDPI journal article supplement (doi:10.3390/jpm12040564), 2022-04-02
Supplement: s1 [file s1]

**Supplementary Table S1. Antibiotic therapy per group between day 1 and day 7**

| Antibiotic used<br>between day 1 and day 7                                                 | Pneumonia<br>n=41 | Non-<br>pneumo<br>nia<br>n=18 | <i>P</i> | NHAI<br>n=24  | Non<br>NHAI<br>n=35 | <i>P</i> | Survivor<br>n=41 | Non-<br>survivor<br>n=18 | <i>P</i> |
|--------------------------------------------------------------------------------------------|-------------------|-------------------------------|----------|---------------|---------------------|----------|------------------|--------------------------|----------|
| b-lactams (only)                                                                           | 5<br>(12.2%)      | 8<br>(44.4%)                  | 0.012    | 1<br>(4.2%)   | 12<br>(34.3%)       | 0.01     | 9<br>(22%)       | 4<br>(22.2%)             | 0.431    |
| b-lactams plus<br>fluoroquinolones                                                         | 6<br>(14.6%)      | 3<br>(16.7%)                  |          | 2<br>(8.3%)   | 7<br>(20%)          |          | 8<br>(19.5%)     | 1<br>(5.6%)              |          |
| b-lactam plus<br>vancomycin                                                                | 19<br>(46.3%)     | 7<br>(38.9%)                  |          | 14<br>(58.3%) | 12<br>(34.3%)       |          | 18<br>(43.9%)    | 8<br>(44.4%)             |          |
| b-lactam plus<br>vancomycin plus<br>other antibiotics<br>(colistin or<br>fluoroquinolones) | 11<br>(26.8%)     | 0<br>(0%)                     |          | 7<br>(29.2%)  | 4<br>(11.4%)        |          | 6<br>(14.6%)     | 5<br>(27.8%)             |          |

NHAI: nursing home and hospital-associated infection;
